# Supplementary material for: MicroRNA-34 directly targets pair-rule genes and cytoskeleton component in the honey bee
Source: PubMed Central journal article supplement (PMC5241629; doi:10.1038/srep40884), 2017-01-18
Supplement: srep40884-s1.pdf [file srep40884-s1.pdf]

## Supplementary Information

**Title:** MicroRNA-34 directly targets pair-rule genes and cytoskeleton component in the honey bee.

**Authors:** Flávia CP Freitas, Camilla V Pires, Charles Claudianos, Alexandre dos Santos Cristino\* & Zilá LP Simões\*

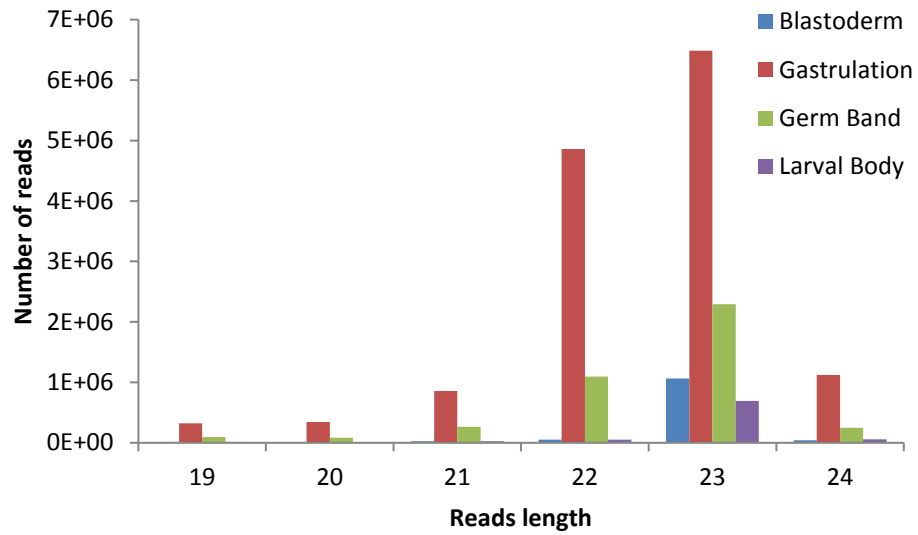

**Figure S1 – Length distribution of 19-24 long reads mapped to the miRNAs precursor sequences.** Most of the reads mapped to the miRNAs precursors are 22-23 nt long.

**Table S1 - Expression levels of miRNAs in female honey bee embryos. The expression levels are presented as RPKM**

| <b>miRNA</b>   | <b>Blastoderm</b> | <b>Gastrulation</b> | <b>Germ band</b> | <b>Larval body</b> |
|----------------|-------------------|---------------------|------------------|--------------------|
| ame-mir-306-5p | 6973073.689       | 2637561.374         | 4032002.286      | 6419773.37         |
| ame-mir-92c-3p | 386413.7078       | 404030.2712         | 601248.9756      | 630602.918         |

|                  |             |             |             |            |
|------------------|-------------|-------------|-------------|------------|
| ame-mir-279b-3p  | 174207.9913 | 335004.1797 | 749809.6364 | 362985.613 |
| ame-mir-6040-5p  | 162813.9115 | 9932.863872 | 35169.2804  | 141190.389 |
| ame-mir-184-3p   | 81392.92034 | 1763681.933 | 1111865.592 | 117303.223 |
| ame-mir-6051-3p  | 68224.47187 | 136616.5148 | 195144.0776 | 93316.962  |
| ame-mir-3791-3p  | 62557.52126 | 26081.46786 | 72171.07012 | 112326.617 |
| ame-mir-279a-3p  | 60301.61589 | 530088.0062 | 322989.6172 | 98206.3771 |
| ame-mir-279c-3p  | 32859.18868 | 138630.1373 | 153090.7452 | 61183.0545 |
| ame-mir-996-3p   | 30621.93924 | 156998.7459 | 110105.9233 | 43462.5206 |
| ame-mir-92a-3p   | 28479.67941 | 78241.73463 | 136000.2193 | 43908.4974 |
| ame-mir-263a-5p  | 23194.29624 | 852666.0565 | 276276.776  | 30662.5408 |
| ame-mir-3747b-5p | 15067.78797 | 34595.95752 | 45188.8964  | 30988.8672 |
| ame-mir-100-5p   | 10458.03021 | 5798.130141 | 10123.56633 | 10460.6236 |
| ame-mir-279c-5p  | 8036.059199 | 17585.18299 | 12759.23316 | 5718.42513 |
| ame-mir-2944-3p  | 6103.973222 | 11749.83199 | 31571.96904 | 13801.849  |
| ame-mir-9a-5p    | 5719.615088 | 79167.52611 | 52847.40307 | 5868.55085 |
| ame-let-7-5p     | 5050.706104 | 10446.6498  | 19277.64292 | 8881.43756 |
| ame-mir-2944-5p  | 4577.979917 | 883.1098705 | 1329.870751 | 3999.02162 |
| ame-mir-2-2-5p   | 4541.646743 | 14405.55523 | 4830.240199 | 2742.23148 |
| ame-mir-317-5p   | 3824.198199 | 2752.259102 | 3694.08542  | 4432.80306 |
| ame-mir-125-5p   | 3689.419004 | 3988.989927 | 6659.229634 | 4993.56152 |
| ame-mir-3785-3p  | 3185.734817 | 94025.05527 | 39880.14042 | 5409.07516 |
| ame-mir-3747a-5p | 3144.080951 | 16259.28439 | 23631.847   | 7549.47003 |
| ame-mir-3791-5p  | 3032.011009 | 445.6036069 | 924.5486313 | 4596.22437 |
| ame-mir-13a-5p   | 2794.889913 | 69221.21147 | 38041.87996 | 4571.32815 |
| ame-mir-317-3p   | 2617.041659 | 9047.860278 | 13289.2923  | 6543.66166 |
| ame-mir-71-3p    | 2429.97847  | 145820.5417 | 47684.43981 | 4108.25855 |
| ame-mir-276-3p   | 2399.174258 | 302681.6849 | 158768.9272 | 3519.66825 |
| ame-mir-3715-5p  | 2263.418513 | 12431.73583 | 11539.6901  | 6542.8371  |
| ame-mir-13b-5p   | 2215.083843 | 63014.70576 | 21143.21109 | 3922.79023 |
| ame-mir-252b-5p  | 2173.091733 | 51729.5319  | 108296.6503 | 360.716343 |
| ame-mir-2-3-3p   | 2172.881772 | 29648.91883 | 26417.9722  | 5746.81254 |
| ame-mir-276-5p   | 2122.726195 | 51057.51101 | 109297.5359 | 2516.06806 |
| ame-mir-13b-3p   | 2099.605539 | 157249.2148 | 93245.28352 | 3096.14861 |
| ame-mir-12-5p    | 2068.36442  | 102252.3051 | 60775.14859 | 5493.31877 |
| ame-mir-275-3p   | 1940.665399 | 42308.42365 | 34438.06979 | 2517.19888 |
| ame-mir-6040-3p  | 1637.69232  | 741.3819039 | 4353.57077  | 2615.19349 |
| ame-mir-11-3p    | 1574.218134 | 15184.59974 | 24821.0787  | 1737.06072 |
| ame-mir-993-3p   | 1565.503635 | 48421.51915 | 13183.78345 | 1947.8007  |
| ame-bantam-3p    | 1458.501847 | 164172.8658 | 35963.04738 | 2115.40786 |
| ame-mir-318-5p   | 1426.753137 | 12.30108802 | 0           | 2767.14779 |
| ame-mir-190-5p   | 1260.603165 | 105569.6596 | 32546.44329 | 3989.52275 |
| ame-mir-92a-5p   | 1210.842514 | 555.9353722 | 1238.653979 | 1044.87501 |
| ame-mir-71-5p    | 1069.854002 | 20871.52667 | 17538.04437 | 1935.39348 |
| ame-mir-31a-5p   | 870.8113972 | 225999.341  | 26968.76199 | 1959.14064 |
| ame-mir-9a-3p    | 810.2788042 | 20202.93935 | 15050.96789 | 996.288865 |
| ame-mir-3747a-3p | 755.074559  | 2106.882621 | 4221.965424 | 1187.35796 |
| ame-mir-279b-5p  | 705.2690731 | 665.1885993 | 1828.966728 | 2299.92172 |
| ame-mir-9c-3p    | 692.114574  | 2147.531027 | 5920.465874 | 1845.10302 |
| ame-mir-92c-5p   | 616.9511641 | 277.9145814 | 589.6326054 | 1274.23781 |
| ame-mir-7-3p     | 562.428817  | 2168.116251 | 2583.930917 | 805.219768 |

|                  |             |             |             |            |
|------------------|-------------|-------------|-------------|------------|
| ame-mir-8-5p     | 536.6344745 | 47926.90581 | 24462.27992 | 377.160764 |
| ame-mir-8-3p     | 487.8495222 | 133958.1395 | 31440.61219 | 1424.82955 |
| ame-mir-6045-3p  | 457.2025651 | 900.6919734 | 1667.898099 | 806.794513 |
| ame-mir-279a-5p  | 431.2589777 | 4295.798261 | 5281.102178 | 593.678981 |
| ame-mir-3747b-3p | 377.7211152 | 31.61745001 | 261.5640812 | 364.436602 |
| ame-mir-306-3p   | 372.2253441 | 676.6179567 | 1303.040673 | 308.526085 |
| ame-mir-305-3p   | 331.7376751 | 673.3478906 | 1240.592405 | 290.243057 |
| ame-mir-3756-5p  | 304.9059514 | 456.2708716 | 573.5866605 | 942.901911 |
| ame-mir-283-5p   | 298.5639076 | 22651.82624 | 13044.49684 | 332.460229 |
| ame-mir-281-5p   | 281.8159861 | 23716.28274 | 4524.785493 | 610.970602 |
| ame-mir-6045-5p  | 276.4480626 | 52.10614722 | 108.637041  | 806.794513 |
| ame-mir-252a-5p  | 273.683582  | 5115.186035 | 2517.184143 | 474.943185 |
| ame-mir-305-5p   | 267.2331272 | 9777.656495 | 10938.25893 | 606.871847 |
| ame-mir-6000a-5p | 220.0300906 | 5.92460566  | 50.86248016 | 484.635903 |
| ame-mir-6051-5p  | 207.3360469 | 1080.051714 | 1888.871895 | 546.809588 |
| ame-mir-125-3p   | 201.5228868 | 156.6836717 | 416.9297322 | 554.840169 |
| ame-mir-275-5p   | 199.0426051 | 320.7877735 | 757.6475045 | 213.724433 |
| ame-mir-34-5p    | 190.7491632 | 1012.44105  | 1388.189671 | 320.58665  |
| ame-mir-14-5p    | 182.4557213 | 187805.2746 | 3070.466202 | 3312.72871 |
| ame-mir-33-5p    | 182.4557213 | 1528.459391 | 1044.25758  | 249.345172 |
| ame-mir-9c-5p    | 173.0286435 | 601.4966553 | 900.0829403 | 589.407909 |
| ame-mir-iab-4-5p | 156.1118471 | 13789.51967 | 10860.39612 | 181.595924 |
| ame-mir-965-3p   | 142.9903772 | 2220.671589 | 2423.509486 | 559.559499 |
| ame-mir-3719-3p  | 141.2956764 | 544.5919466 | 498.4523056 | 228.676348 |
| ame-mir-3763-5p  | 126.3762572 | 0           | 16.61507685 | 576.716725 |
| ame-mir-29b-3p   | 124.4016282 | 9661.372943 | 3192.587017 | 201.850854 |
| ame-mir-315-5p   | 121.3674421 | 33460.38455 | 5157.765626 | 333.039428 |
| ame-mir-993-5p   | 121.1401623 | 4594.331984 | 1680.176311 | 106.728806 |
| ame-mir-1175-3p  | 120.1948098 | 318.1792297 | 146.2849158 | 154.872778 |
| ame-mir-14-3p    | 116.1081863 | 130294.9941 | 3404.429247 | 3965.77559 |
| ame-mir-87-2-5p  | 116.1081863 | 5078.897825 | 1328.375394 | 225.598013 |
| ame-mir-750-3p   | 115.8642615 | 13648.63604 | 2285.183916 | 488.912102 |
| ame-mir-3723-3p  | 114.1299341 | 12.65093548 | 22.86478466 | 239.650231 |
| ame-mir-6064-5p  | 107.3268949 | 151.9835605 | 357.7128311 | 251.44051  |
| ame-mir-375-3p   | 99.52130253 | 9473.400017 | 4687.943934 | 166.230115 |
| ame-mir-277-3p   | 98.73145093 | 2116.812231 | 1516.125763 | 212.028208 |
| ame-mir-3786-3p  | 95.69356013 | 1129.121601 | 661.407867  | 194.087359 |
| ame-mir-3759-3p  | 90.14610737 | 142.7862163 | 16.25387953 | 232.309167 |
| ame-mir-7-5p     | 85.79422632 | 2844.661953 | 3572.241523 | 95.5345487 |
| ame-mir-3756-3p  | 85.37366639 | 644.1157216 | 844.8033562 | 1004.01592 |
| ame-mir-263b-5p  | 82.02305154 | 7145.985904 | 1128.36456  | 143.526787 |
| ame-mir-3746-5p  | 81.67783668 | 115.4624853 | 341.7419216 | 287.844354 |
| ame-mir-3759-5p  | 81.13149663 | 190.9075378 | 100.2322571 | 90.3424537 |
| ame-mir-927a-5p  | 74.6409769  | 1328.148474 | 3362.060801 | 94.988637  |
| ame-mir-996-5p   | 72.90937915 | 575.0285532 | 854.4896667 | 91.3352279 |
| ame-mir-11-5p    | 69.11201565 | 927.3653582 | 1250.746063 | 109.940552 |
| ame-mir-13a-3p   | 66.34753502 | 1441.367688 | 1722.152716 | 106.862217 |
| ame-mir-283-3p   | 66.34753502 | 727.2157218 | 1046.749842 | 0          |
| ame-mir-184-5p   | 63.10227516 | 1588.00361  | 1446.595278 | 154.872778 |
| ame-mir-3743-3p  | 60.68372106 | 683.2804357 | 361.6818559 | 144.799752 |

|                 |             |             |             |            |
|-----------------|-------------|-------------|-------------|------------|
| ame-mir-6039-5p | 56.54619462 | 842.0514108 | 1702.101339 | 0          |
| ame-mir-307-3p  | 56.12103526 | 2067.60942  | 1099.968058 | 169.622566 |
| ame-mir-2796-3p | 51.83401174 | 2092.242089 | 251.1732321 | 74.2098726 |
| ame-mir-33-3p   | 49.76065127 | 114.6707426 | 107.1672457 | 0          |
| ame-mir-219-5p  | 48.78495222 | 49.09581308 | 21.99054289 | 0          |
| ame-mir-750-5p  | 48.78495222 | 2240.796947 | 637.7257439 | 0          |
| ame-mir-3049-5p | 48.37841095 | 2383.530572 | 2357.264029 | 108.841147 |
| ame-mir-2-1-5p  | 46.5923701  | 1005.468821 | 501.2525994 | 0          |
| ame-mir-1000-5p | 45.56836197 | 7768.867042 | 736.7234627 | 378.388801 |
| ame-mir-3715-3p | 43.19500978 | 244.9454153 | 269.9949989 | 98.9464969 |
| ame-mir-3719-5p | 30.7164514  | 116.1222709 | 88.61374322 | 0          |
| ame-mir-3720-5p | 29.61943528 | 266.4591396 | 206.5016695 | 0          |
| ame-mir-193-3p  | 0           | 125.0266047 | 18.84903677 | 0          |
| ame-mir-210-3p  | 0           | 17.93064478 | 43.98108579 | 0          |
| ame-mir-2765-5p | 0           | 457.4760815 | 229.6240958 | 0          |
| ame-mir-3725-5p | 0           | 11.11530747 | 11.22640328 | 0          |
| ame-mir-3727-3p | 0           | 852.2231059 | 717.4692277 | 0          |
| ame-mir-3730-5p | 0           | 20.84641832 | 18.55939436 | 0          |
| ame-mir-3732-3p | 0           | 15.16522195 | 24.17865661 | 0          |
| ame-mir-3772-5p | 0           | 9.072052418 | 0           | 0          |
| ame-mir-3793-5p | 0           | 584.1953754 | 203.0731615 | 0          |
| ame-mir-3797-3p | 0           | 3.155496493 | 0           | 0          |
| ame-mir-3798-3p | 0           | 10.92548248 | 0           | 0          |
| ame-mir-6001-3p | 0           | 19.21140512 | 32.98581434 | 0          |
| ame-mir-6012-3p | 0           | 40.13049069 | 14.66036193 | 0          |
| ame-mir-6043-3p | 0           | 123.5760654 | 26.94336787 | 0          |
| ame-mir-6052-5p | 0           | 19.63832523 | 17.59243432 | 0          |
| ame-mir-6055-5p | 0           | 40.94054424 | 15.97603544 | 0          |
| ame-mir-6056-5p | 0           | 7.443735317 | 19.17124252 | 0          |
| ame-mir-6057-5p | 0           | 5.806113547 | 0           | 0          |
| ame-mir-6059-3p | 0           | 8.797141738 | 0           | 0          |
| ame-mir-927b-5p | 0           | 11.26185817 | 15.03950922 | 0          |
| ame-mir-929-3p  | 0           | 26.85327516 | 0           | 0          |
| ame-mir-932-5p  | 0           | 75.47947611 | 147.0434301 | 71.2414777 |
| ame-mir-981-3p  | 0           | 116.5855247 | 151.1264969 | 0          |
| ame-mir-989-3p  | 0           | 391.7565861 | 160.7910663 | 0          |
| ame-bantam-5p   | 0           | 92.59750054 | 28.64668423 | 0          |
| ame-let-7-3p    | 0           | 52.98078612 | 117.1362918 | 0          |
| ame-mir-1000-3p | 0           | 9.570516836 | 0           | 0          |
| ame-mir-100-3p  | 0           | 35.56244548 | 69.78332278 | 59.3678981 |
| ame-mir-1175-5p | 0           | 805.1775218 | 204.0764874 | 51.6242592 |
| ame-mir-124-3p  | 0           | 1698.476723 | 61.49736238 | 92.5213997 |
| ame-mir-124-5p  | 0           | 186.6250783 | 0           | 0          |
| ame-mir-12-3p   | 0           | 43.72073454 | 27.02452259 | 0          |
| ame-mir-133-3p  | 0           | 532.498897  | 47.60499548 | 0          |
| ame-mir-133-5p  | 0           | 9.78558463  | 0           | 0          |
| ame-mir-137-3p  | 0           | 205.3912667 | 152.0279532 | 0          |
| ame-mir-137-5p  | 0           | 17.41834064 | 17.4458307  | 0          |
| ame-mir-190-3p  | 0           | 15.96681226 | 0           | 0          |
| ame-mir-2-1-3p  | 0           | 402.8399006 | 322.0337929 | 0          |

|                 |   |             |             |            |
|-----------------|---|-------------|-------------|------------|
| ame-mir-219-3p  | 0 | 7.115335229 | 0           | 0          |
| ame-mir-2-2-3p  | 0 | 17.28009984 | 20.76884607 | 0          |
| ame-mir-2-3-5p  | 0 | 1362.985155 | 655.4647819 | 71.2414777 |
| ame-mir-252a-3p | 0 | 36.28820967 | 0           | 0          |
| ame-mir-252b-3p | 0 | 47.77182033 | 463.7499299 | 0          |
| ame-mir-263a-3p | 0 | 270.3671006 | 95.85621261 | 0          |
| ame-mir-263b-3p | 0 | 43.06732576 | 19.17124252 | 0          |
| ame-mir-278-3p  | 0 | 102.553636  | 62.3065382  | 0          |
| ame-mir-278-5p  | 0 | 211.418265  | 73.14245789 | 0          |
| ame-mir-2788-3p | 0 | 171.6059261 | 44.25511124 | 0          |
| ame-mir-2788-5p | 0 | 114.6300455 | 0           | 0          |
| ame-mir-2796-5p | 0 | 25.51514742 | 0           | 0          |
| ame-mir-281-3p  | 0 | 1378.951967 | 195.9933823 | 0          |
| ame-mir-282-3p  | 0 | 18.93297896 | 0           | 0          |
| ame-mir-282-5p  | 0 | 42.59920266 | 16.25387953 | 0          |
| ame-mir-29b-5p  | 0 | 87.09170321 | 34.89166139 | 0          |
| ame-mir-3049-3p | 0 | 765.0764206 | 504.6829594 | 118.735796 |
| ame-mir-307-5p  | 0 | 153.8838365 | 91.82016156 | 0          |
| ame-mir-315-3p  | 0 | 111.5198639 | 0           | 0          |
| ame-mir-316-3p  | 0 | 1584.449245 | 0           | 0          |
| ame-mir-316-5p  | 0 | 10181.08534 | 25.20264466 | 560.326229 |
| ame-mir-318-3p  | 0 | 42.43875368 | 255.5624109 | 0          |
| ame-mir-31a-3p  | 0 | 5.080349354 | 0           | 0          |
| ame-mir-34-3p   | 0 | 94.34934514 | 117.1362918 | 0          |
| ame-mir-3477-3p | 0 | 5.131666014 | 12.58717943 | 0          |
| ame-mir-3477-5p | 0 | 285.9071065 | 181.2553839 | 0          |
| ame-mir-3720-3p | 0 | 56.50592649 | 48.06504375 | 0          |
| ame-mir-3770-3p | 0 | 5.462741241 | 18.75895774 | 0          |
| ame-mir-3770-5p | 0 | 10.92548248 | 18.75895774 | 0          |
| ame-mir-3773-3p | 0 | 16.0343252  | 0           | 0          |
| ame-mir-3773-5p | 0 | 49.79079932 | 28.97978521 | 0          |
| ame-mir-3783-3p | 0 | 95.94848659 | 0           | 0          |
| ame-mir-3783-5p | 0 | 4.305380808 | 0           | 0          |
| ame-mir-3785-5p | 0 | 66.24038273 | 37.58172145 | 0          |
| ame-mir-3786-5p | 0 | 128.4044342 | 136.595103  | 0          |
| ame-mir-6005-3p | 0 | 171.422831  | 119.2615946 | 0          |
| ame-mir-6005-5p | 0 | 101.0726821 | 77.97873492 | 0          |
| ame-mir-6037-3p | 0 | 305.3214883 | 355.2188844 | 0          |
| ame-mir-6037-5p | 0 | 80.08432479 | 88.80472111 | 0          |
| ame-mir-6039-3p | 0 | 165.7711396 | 467.2990365 | 0          |
| ame-mir-6042-3p | 0 | 8.268199672 | 0           | 0          |
| ame-mir-6042-5p | 0 | 5.512133114 | 0           | 0          |
| ame-mir-6044-3p | 0 | 352.6469606 | 313.1302945 | 106.557766 |
| ame-mir-6044-5p | 0 | 160.0403093 | 236.4453244 | 0          |
| ame-mir-6048-3p | 0 | 9.167547706 | 0           | 0          |
| ame-mir-6048-5p | 0 | 3.819811544 | 0           | 0          |
| ame-mir-6053-3p | 0 | 23.9172291  | 0           | 0          |
| ame-mir-6053-5p | 0 | 216.0797939 | 138.7736533 | 0          |
| ame-mir-6060-3p | 0 | 24.53287414 | 70.20455008 | 0          |
| ame-mir-6060-5p | 0 | 145.1528387 | 186.0420577 | 0          |

|                  |   |             |             |            |
|------------------|---|-------------|-------------|------------|
| ame-mir-6061-3p  | 0 | 61.55215311 | 25.23809142 | 0          |
| ame-mir-6061-5p  | 0 | 13.78033279 | 0           | 0          |
| ame-mir-6065-3p  | 0 | 178.5761897 | 163.9645742 | 0          |
| ame-mir-6065-5p  | 0 | 15.27924618 | 0           | 0          |
| ame-mir-6066-3p  | 0 | 6.912039937 | 0           | 0          |
| ame-mir-6066-5p  | 0 | 6.912039937 | 0           | 0          |
| ame-mir-6067-3p  | 0 | 9.304669146 | 0           | 0          |
| ame-mir-6067-5p  | 0 | 125.6130335 | 89.46579844 | 76.1126899 |
| ame-mir-87-1-3p  | 0 | 34.11091709 | 34.89166139 | 0          |
| ame-mir-87-1-5p  | 0 | 773.6646302 | 490.975521  | 0          |
| ame-mir-87-2-3p  | 0 | 5.806113547 | 0           | 0          |
| ame-mir-927a-3p  | 0 | 355.6244548 | 578.2046745 | 0          |
| ame-mir-965-5p   | 0 | 216.8950463 | 286.4668423 | 0          |
| ame-mir-971-3p   | 0 | 6.286146557 | 15.69928522 | 0          |
| ame-mir-971-5p   | 0 | 6.857614426 | 11.77446391 | 0          |
| ame-mir-980-3p   | 0 | 237.1392306 | 60.85754894 | 0          |
| ame-mir-980-5p   | 0 | 21.09779632 | 14.4898926  | 0          |
| ame-mir-iab-4-3p | 0 | 109.2915491 | 82.0980268  | 0          |

---



**Table S2 - Sequence and read numbers of the novel miRNAs described from *A. mellifera* embryogenesis libraries.**

| <b>miRNA</b>   | <b>Reads Number</b> | <b>Sequence (5' - 3')</b> |
|----------------|---------------------|---------------------------|
| ame-miR-92c-3p | 736069              | AAUUGCACUCGUCCCGCCUGC     |
| ame-miR-14-5p  | 260302              | GGGGGUGAGAAACUGGCUUGGCU   |
| ame-miR-71-3p  | 220692              | UCUCACUAUCUUGUCUUUCAUC    |
| ame-miR-13a-5p | 111363              | ACAUCAAUUGGUUGUGGAAUG     |
| ame-miR-276-5p | 96325               | AGCGAGGUAUAGAGUCCUACG     |

|                  |       |                          |
|------------------|-------|--------------------------|
| ame-miR-13b-5p   | 75766 | UCGUCAAUUGGUUGUGGCGUG    |
| ame-miR-8-5p     | 64556 | CAUCUUACCGGGCAGCAUUAGA   |
| ame-miR-6040-5p  | 46863 | CCUCAGUCCAGCCUUGUACUGUG  |
| ame-miR-281-5p   | 35616 | AAGAGAGCUAUCCAUCGACAGU   |
| ame-miR-9a-3p    | 29630 | AUAAAGCUAGGUUACCGGAGUUA  |
| ame-miR-279c-5p  | 26796 | GACGGGUGCACUCUGGUUAUCAUG |
| ame-miR-2-2-5p   | 18955 | CCCAUCAGAGUGGUUGUGAUGUG  |
| ame-miR-279a-5p  | 8140  | AAUGAGUGAAGGUCUAGUGCAC   |
| ame-miR-87-2-5p  | 7564  | GGGCCUGACUCUUUGCUCUGCC   |
| ame-miR-993-5p   | 6255  | UACCCUGUAGAUCGGGGCUUUUG  |
| ame-miR-317-5p   | 5498  | AGGGAGCCACUCUGCGUUCACU   |
| ame-miR-750-5p   | 4555  | AGUUGGAAGUGAGGAUCUAGGCA  |
| ame-miR-7-3p     | 3619  | CAAGGAAUCACUAAUCAUCCU    |
| ame-miR-2944-5p  | 3299  | CGGAGGAACUCUUGCUGUGAUAU  |
| ame-miR-3747a-3p | 3208  | UCGUUGGAAAAAGUCUUGGAGA   |
| ame-miR-184-5p   | 2566  | CCUUAUCAUUCUCCUGUCCGGU   |
| ame-miR-279b-5p  | 2450  | ACGAAGUAUUAUCUAGUGCAACG  |
| ame-miR-2-3-5p   | 2147  | CCAUCAAAGUUGGUUUUGUCAUA  |
| ame-miR-316-3p   | 1943  | CCAGCAAAGGGGAACAGGCCGA   |
| ame-miR-11-5p    | 1941  | UGGAGCUCUGGCUGUGACUUGUG  |
| ame-miR-306-3p   | 1938  | CAAAGCAGCUUGGUACCUAACU   |
| ame-miR-3786-3p  | 1923  | UCUGUAUGGCUCAGGACGAUAC   |
| ame-miR-3756-3p  | 1797  | CUUCUUAUGAUAGAAAUCAGCU   |
| ame-miR-6051-5p  | 1761  | AAUCAGAGCUUGUGUAAUUUUC   |
| ame-miR-9c-5p    | 1752  | UCUUUGGUGAGCUAACUGUAUGG  |
| ame-miR-1175-5p  | 1650  | AAGUGGAGAAGUGGUCUUUACGCU |
| ame-miR-3791-5p  | 1616  | AUGAAAUCUCGUCCGGUGUGGU   |
| ame-miR-6045-3p  | 1586  | CAUGUCGCCGUCCAGUCAGAGUCU |
| ame-miR-92a-5p   | 1497  | AGGCCGAGAUUUGUGACAAUGUU  |
| ame-miR-283-3p   | 1430  | CAGGAUUCUUGCUGGUUACCGG   |
| ame-miR-2-1-5p   | 1417  | CUCACAAAGUGGUUGUGAUUUG   |
| ame-miR-305-3p   | 1341  | CGGCACCUGUUGGAGCGCAAUUC  |
| ame-miR-87-1-5p  | 1263  | ACGCCUGAAAUUUGCUUUUUACCU |
| ame-miR-996-5p   | 1048  | GGCGAGUAUGAAUGUGGUGCACG  |
| ame-miR-275-5p   | 788   | CGCGUUACUCGGGUACUUUAGGCU |
| ame-miR-927a-3p  | 722   | CAAAGCGUUUGAAAUCUGAAAC   |
| ame-miR-318-5p   | 498   | GGAUGAACGUGAUCCUGUUUGACG |
| ame-miR-125-3p   | 486   | UCACAGGCUAGAUUCUCUGGUA   |
| ame-miR-6044-3p  | 484   | UGC UAAUCUAAGAGUCUCGGGUU |
| ame-miR-3715-3p  | 441   | UAUUAUGCUCCGUUUAUCGUUG   |
| ame-miR-3746-5p  | 436   | UUCUUUGUUUUUUUUUUCUUUUU  |
| ame-miR-263a-3p  | 374   | CGUGGAGCUC CCGUGUCAUACA  |
| ame-miR-6039-3p  | 366   | GUAGACACACGUGUUGGACCU    |
| ame-miR-307-5p   | 331   | ACUCACUCAACCUGGGUGUGAU   |
| ame-miR-3759-5p  | 295   | GGCUAGUUUUGACGGAGGGUC    |
| ame-miR-278-5p   | 295   | CCGGAUGAGGUCUUCAUCGACC   |
| ame-miR-3719-5p  | 269   | ACCGAAAUGUCGCGCAAACUGU   |
| ame-miR-3747b-3p | 227   | CUGCUGGAAAAAAUCUCGCGGA   |
| ame-miR-33-3p    | 207   | CAAUACUUCUACAGUGCAACUC   |
| ame-miR-252b-3p  | 199   | AUCUUGGCACGAUUACUUUUA    |

|                  |                              |
|------------------|------------------------------|
| ame-miR-124-5p   | 198 UGCGUUCACUGCGGGCUUCCAUG  |
| ame-miR-34-3p    | 177 CGACCGCUAUCGGCACUGCAAUU  |
| ame-miR-2788-5p  | 169 UGGGGUUUCUAUGCGGCAUGUGCC |
| ame-miR-iab-4-3p | 156 UCCGGUAUACCUUCAGUAUACG   |
| ame-miR-3720-3p  | 136 AGAGUCAUAGUUACGCUGAGUAUG |
| ame-miR-29b-5p   | 134 ACUGACUUCUAUGCGUGCUGGG   |
| ame-miR-3785-5p  | 134 UCUCACGACGUGAUAGCGGCGCC  |
| ame-miR-6037-5p  | 127 GAAUAGUCCAUAAGAGCUUCA    |
| ame-miR-315-3p   | 126 CUUUCGGGCAAUAUCAUAUC     |
| ame-bantam-5p    | 121 CUGGUUUUCACAAUGAUUUGACAG |
| ame-let-7-3p     | 120 AAGUCCACUGUACAACUUGCU    |
| ame-miR-100-3p   | 82 CAAGCUCCUAUCUACCGGUACA    |
| ame-miR-3773-5p  | 69 UGGCAAGUGCUGUUGCAAACUGUC  |
| ame-miR-3723-3p  | 66 CACGACGAUAUCUCCGGAACCGGA  |
| ame-miR-263b-3p  | 61 CGUGGAUCUUGCAAUGCCAUC     |
| ame-miR-12-3p    | 59 CAGUACUUGUGUUUAUCUACG     |
| ame-miR-252a-3p  | 50 CUGCUGCUCAAGUGCUUAUCA     |
| ame-miR-2796-5p  | 45 AGGGGUUUCUAUCGGCCUCCAG    |
| ame-miR-6060-3p  | 44 GUUGCCCCUUGUCCCCGAGA      |
| ame-miR-929-3p   | 37 CUUCCUAUAGAGUCAGGCUG      |
| ame-miR-137-5p   | 31 ACGCGUAUUCUUGGGGAAUUA     |
| ame-miR-980-5p   | 30 CGGCUCGUCAUCGGGCACUUUGC   |
| ame-miR-6053-3p  | 29 GCUCGCGCAGUGUUUCGUAAAG    |
| ame-miR-282-3p   | 24 ACAUAGCCUAGAAUAGGUUAGGU   |
| ame-miR-190-3p   | 22 ACCAGGAAUCAACAUAUUAUU     |
| ame-miR-3725-5p  | 22 AAGGAAGAGAGAGAGAGAG       |
| ame-miR-971-5p   | 18 CACUUUAAGUUCGAAUACCAAG    |
| ame-miR-6065-5p  | 16 CGGGGGGAACCGCAUUCAGAGU    |
| ame-miR-6061-5p  | 15 ACGUGGUACAUGCCGAACGUUCGU  |
| ame-miR-3770-3p  | 14 AAUGCAUUGUAAGCAGGAUAGU    |
| ame-miR-3772-5p  | 12 GGGUUCGAUUCCCAGGGCU       |
| ame-miR-1000-3p  | 12 CUGGUGUGAUGGGACAUUGUCC    |
| ame-miR-133-5p   | 12 AGCUGGUUGAACACGGGUCAAAU   |
| ame-miR-3477-3p  | 12 CAUAAUACCUCGUGGGGUUUC     |
| ame-miR-6067-3p  | 10 CAAAAAGCGGGAUUCGUUUU      |
| ame-miR-219-3p   | 10 AGAAUUGUGUGGGGACAUCAGC    |
| ame-miR-6066-3p  | 8 CCUCUUCUCUCUCGUCCUC        |
| ame-miR-31a-3p   | 7 GCUGUGUCACAUCCAGCCAACC     |
| ame-miR-3783-5p  | 7 CCACCAAACAAGUGAGAGUGUG     |
| ame-miR-3797-3p  | 6 AGAAAGAAAGGAAGAAUA         |
| ame-miR-6042-5p  | 6 ACCACUGUACUAUCGUCGCCUGC    |
| ame-miR-6048-5p  | 5 AAUCAGCGGUCGAACCUCGUCGAU   |

---

Table S3(a) - miRNA-target interactions predicted by RNAhybrid in both *A. mellifera* and *D. melanogaster*. miRNAs were classified according to the miRNA family (first row) and only miRNAs from families conserved in both species were considered for further analysis. Third row: number of genes predicted for each miRNA. Fourth row: Number of predicted targets with ortholog in the other species. miR-34 presented one of the highest number of predicted targets in both species.

| miRNA_family | miRNA     | N_Targets_Apis | N_Targets_Drosophila | <i>Apis</i> $\cap$ <i>Drosophila</i> |
|--------------|-----------|----------------|----------------------|--------------------------------------|
| mir-34       | miR-34-5p | 9440           | 12624                | 2881                                 |

|           |              |      |       |      |
|-----------|--------------|------|-------|------|
| mir-210   | miR-210-3p   | 9618 | 11987 | 2773 |
| mir-31    | miR-31a-5p   | 8825 | 11393 | 2388 |
| mir-317   | miR-317-3p   | 8891 | 11256 | 2335 |
| mir-124   | miR-124-3p   | 8641 | 11531 | 2305 |
| mir-282   | miR-282-5p   | 8998 | 10384 | 2129 |
| mir-275   | miR-275-3p   | 8206 | 10395 | 1972 |
| mir-980   | miR-980-3p   | 7178 | 11568 | 1888 |
| mir-278   | miR-278-3p   | 7942 | 10857 | 1820 |
| mir-316   | miR-316-5p   | 7356 | 7803  | 1244 |
| mir-932   | miR-932-5p   | 6710 | 7680  | 1212 |
| mir-10    | miR-993-3p   | 6632 | 8486  | 1202 |
| mir-25    | miR-92a-3p   | 5574 | 9882  | 1185 |
| mir-305   | miR-305-5p   | 6035 | 8334  | 1144 |
| mir-184   | miR-184-3p   | 6820 | 7877  | 1110 |
| mir-263   | miR-263a-5p  | 4773 | 8529  | 933  |
| let-7     | let-7-5p     | 5663 | 6623  | 923  |
| mir-9     | miR-9a-5p    | 5479 | 7285  | 912  |
| mir-33    | miR-33-5p    | 4127 | 8173  | 873  |
| mir-375   | miR-375-3p   | 7030 | 5899  | 868  |
| mir-133   | miR-133-3p   | 4842 | 8548  | 801  |
| mir-965   | miR-965-5p   | 6706 | 5137  | 735  |
| mir-190   | miR-190-5p   | 8032 | 3750  | 724  |
| mir-9     | miR-9b-5p    | 3802 | 7615  | 661  |
| mir-263   | miR-263b-5p  | 3419 | 8033  | 602  |
| mir-981   | miR-981-3p   | 4534 | 6371  | 599  |
| mir-971   | miR-971-3p   | 5414 | 4663  | 591  |
| mir-12    | miR-12-5p    | 4732 | 5180  | 580  |
| mir-277   | miR-277-3p   | 4443 | 5375  | 565  |
| mir-7     | miR-7-5p     | 5238 | 4759  | 553  |
| mir-965   | miR-965-3p   | 4011 | 6649  | 534  |
| mir-14    | miR-14-3p    | 4487 | 4711  | 467  |
| bantam    | bantam-3p    | 5221 | 3811  | 450  |
| mir-1000  | miR-1000-5p  | 3193 | 6008  | 445  |
| mir-10    | miR-125-5p   | 3617 | 6286  | 430  |
| mir-929   | miR-929-5p   | 3890 | 4752  | 385  |
| mir-11    | miR-11-3p    | 4073 | 3647  | 344  |
| mir-10    | miR-10-5p    | 2782 | 5486  | 317  |
| mir-10    | miR-100-5p   | 3930 | 3945  | 315  |
| mir-iab-4 | miR-iab-4-5p | 3249 | 3151  | 248  |
| mir-315   | miR-315-5p   | 2589 | 3534  | 198  |
| mir-137   | miR-137-3p   | 2706 | 2715  | 176  |
| mir-2     | miR-13a-3p   | 2201 | 3662  | 176  |
| mir-8     | miR-8-3p     | 2340 | 2846  | 156  |
| mir-219   | miR-219-5p   | 2899 | 1990  | 128  |
| mir-9     | miR-9c-3p    | 3318 | 1299  | 89   |
| mir-216   | miR-283-5p   | 784  | 3063  | 50   |
| mir-9     | miR-79-3p    | 708  | 2560  | 44   |

---

**Table S3(b)- Description of the distribution of targets predicted for each miRNA in *A. mellifera* , *D. melanogaster* and for the intersection between *A. mellifera* and *D. melanogaster* .**

| <b>N_Targets/miRN</b>  | <b><i>Apis</i></b> | <b><i>Drosophila</i></b> | <b><i>Apis</i> <math>\cap</math> <i>Drosophila</i></b> |
|------------------------|--------------------|--------------------------|--------------------------------------------------------|
| <b>Total</b>           | 251098             | 318112                   | 43460                                                  |
| <b>Average</b>         | 5231               | 6627                     | 905                                                    |
| <b>St.Dev</b>          | 1889               | 2545                     | 586                                                    |
| <b>Minimum</b>         | 708                | 1299                     | 44                                                     |
| <b>First Quartile</b>  | 3568               | 3912                     | 375                                                    |
| <b>Second Quartile</b> | 4808               | 6329                     | 632                                                    |
| <b>Third Quartile</b>  | 6873               | 8497                     | 1189                                                   |
| <b>Maximum</b>         | 9618               | 12624                    | 2881                                                   |

**TableS4 - Gene Ontology analysis of the 2881 genes predicted as *miR-34-5p* in both *A. mellifera* and *D. melanogaster* . This chart was generated by ClueGO plugin in the Cytoscape platform**

| <b>GOID</b> | <b>GO Term</b>                       | <b>GO Levels</b> | <b>Nr. Genes</b> | <b>% Associated Genes</b> | <b>Term P Value</b> | <b>Term P Value Corrected with Bonferroni step down</b> |
|-------------|--------------------------------------|------------------|------------------|---------------------------|---------------------|---------------------------------------------------------|
| GO:0009653  | anatomical structure morphogenesis   | [2, 3]           | 748              | 37.47495                  | 1.21E-87            | 1.57E-84                                                |
| GO:0007389  | pattern specification process        | [3, 4]           | 274              | 44.99179                  | 4.85E-46            | 6.01E-43                                                |
| GO:0050794  | regulation of cellular process       | [2, 3]           | 1117             | 35.449062                 | 9.37E-126           | 1.22E-122                                               |
| GO:0048731  | system development                   | [3, 4]           | 916              | 36.262867                 | 8.65E-103           | 1.12E-99                                                |
| GO:0007275  | multicellular organismal development | [3]              | 1058             | 33.61932                  | 2.35E-98            | 3.05E-95                                                |
| GO:0048869  | cellular developmental process       | [3]              | 899              | 35.589867                 | 8.11E-95            | 1.05E-91                                                |
| GO:0030154  | cell differentiation                 | [4]              | 859              | 35.39349                  | 6.58E-88            | 8.53E-85                                                |

|            |                                               |           |     |           |          |          |
|------------|-----------------------------------------------|-----------|-----|-----------|----------|----------|
| GO:0007154 | cell communication                            | [3]       | 705 | 36.969063 | 1.77E-78 | 2.29E-75 |
| GO:0048468 | cell development                              | [3, 4, 5] | 635 | 38.34541  | 6.57E-77 | 8.49E-74 |
| GO:0007399 | nervous system development                    | [4, 5]    | 644 | 38.061466 | 1.36E-76 | 1.76E-73 |
| GO:0048513 | organ development                             | [3, 4, 5] | 597 | 39.019608 | 4.36E-75 | 5.63E-72 |
| GO:0019222 | regulation of metabolic process               | [2, 3]    | 678 | 36.49085  | 4.28E-72 | 5.52E-69 |
| GO:0009888 | tissue development                            | [3]       | 514 | 40.250587 | 8.53E-69 | 1.10E-65 |
| GO:0060429 | epithelium development                        | [4]       | 476 | 41.319443 | 1.58E-67 | 2.04E-64 |
| GO:0048518 | positive regulation of biological process     | [1, 2, 3] | 497 | 40.340908 | 1.17E-66 | 1.51E-63 |
| GO:0022008 | neurogenesis                                  | [5, 6]    | 567 | 38.156124 | 1.35E-66 | 1.74E-63 |
| GO:0031323 | regulation of cellular metabolic process      | [3, 4]    | 604 | 37.14637  | 2.37E-66 | 3.05E-63 |
| GO:0048699 | generation of neurons                         | [6, 7]    | 417 | 43.4375   | 5.69E-66 | 7.31E-63 |
| GO:0060255 | regulation of macromolecule metabolic process | [3, 4]    | 609 | 36.708862 | 1.05E-64 | 1.34E-61 |



|            |                                         |              |     |           |          |          |
|------------|-----------------------------------------|--------------|-----|-----------|----------|----------|
| GO:0080090 | regulation of primary metabolic process | [3, 4]       | 585 | 37.048763 | 1.80E-63 | 2.31E-60 |
| GO:0009887 | organ morphogenesis                     | [3, 4, 5, 6] | 420 | 42.12638  | 8.38E-62 | 1.07E-58 |
| GO:0035295 | tube development                        | [3, 4]       | 387 | 43.58108  | 2.24E-61 | 2.87E-58 |
| GO:0048522 | positive regulation of cellular process | [2, 3, 4]    | 441 | 41.09972  | 2.64E-61 | 3.38E-58 |
| GO:0048729 | tissue morphogenesis                    | [3, 4]       | 350 | 45.572918 | 4.53E-61 | 5.79E-58 |
| GO:0030182 | neuron differentiation                  | [5, 7, 8]    | 383 | 43.62187  | 7.82E-61 | 9.99E-58 |
| GO:0009791 | post-embryonic development              | [3, 4]       | 339 | 46.122448 | 1.24E-60 | 1.59E-57 |
| GO:0002009 | morphogenesis of an epithelium          | [4, 5]       | 342 | 45.47872  | 2.48E-59 | 3.16E-56 |
| GO:0035239 | tube morphogenesis                      | [3, 4, 5]    | 306 | 47.589424 | 2.81E-58 | 3.58E-55 |
| GO:0002165 | instar larval or pupal development      | [4, 5]       | 312 | 46.77661  | 2.53E-57 | 3.22E-54 |

|            |                                      |                 |     |           |          |          |
|------------|--------------------------------------|-----------------|-----|-----------|----------|----------|
| GO:0032989 | cellular component morphogenesis     | [3, 4]          | 395 | 41.887592 | 4.52E-57 | 5.75E-54 |
| GO:0007444 | imaginal disc development            | [3, 4, 5, 6]    | 332 | 45.170067 | 1.18E-56 | 1.51E-53 |
| GO:0048569 | post-embryonic organ development     | [3, 4, 5, 6]    | 286 | 48.067226 | 1.70E-55 | 2.16E-52 |
| GO:0007165 | signal transduction                  | [3, 4]          | 527 | 36.827393 | 2.08E-55 | 2.64E-52 |
| GO:0009886 | post-embryonic morphogenesis         | [3, 4, 5]       | 274 | 48.495575 | 4.31E-54 | 5.46E-51 |
| GO:0010468 | regulation of gene expression        | [4, 5]          | 492 | 37.5      | 4.32E-54 | 5.47E-51 |
| GO:0060562 | epithelial tube morphogenesis        | [4, 5, 6]       | 285 | 47.5      | 6.17E-54 | 7.81E-51 |
| GO:0048707 | instar larval or pupal morphogenesis | [4, 5, 6]       | 265 | 48.62385  | 1.47E-52 | 1.86E-49 |
| GO:0050793 | regulation of developmental process  | [2, 3]          | 317 | 44.335663 | 9.16E-52 | 1.16E-48 |
| GO:0007560 | imaginal disc morphogenesis          | [4, 5, 6, 7, 8] | 258 | 48.863636 | 1.16E-51 | 1.47E-48 |

|            |                                                                |                 |     |           |          |          |
|------------|----------------------------------------------------------------|-----------------|-----|-----------|----------|----------|
| GO:0051171 | regulation of nitrogen compound metabolic process              | [3, 4]          | 476 | 37.362637 | 1.31E-51 | 1.65E-48 |
| GO:0048666 | neuron development                                             | [4, 5, 6, 8, 9] | 329 | 43.46103  | 2.17E-51 | 2.73E-48 |
| GO:0031326 | regulation of cellular biosynthetic process                    | [4, 5]          | 452 | 38.04714  | 2.42E-51 | 3.05E-48 |
| GO:0051252 | regulation of RNA metabolic process                            | [4, 5, 6, 7]    | 429 | 38.82353  | 2.73E-51 | 3.44E-48 |
| GO:0007552 | metamorphosis                                                  | [3, 4]          | 272 | 47.38676  | 3.75E-51 | 4.72E-48 |
| GO:0019219 | regulation of nucleobase-containing compound metabolic process | [4, 5]          | 442 | 38.2684   | 6.34E-51 | 7.97E-48 |
| GO:0016070 | RNA metabolic process                                          | [4, 5, 6]       | 571 | 34.753498 | 9.86E-51 | 1.24E-47 |
| GO:1901362 | organic cyclic compound biosynthetic process                   | [4]             | 501 | 36.35704  | 2.09E-50 | 2.63E-47 |

|            |                                                                 |        |     |           |          |          |
|------------|-----------------------------------------------------------------|--------|-----|-----------|----------|----------|
| GO:2000112 | regulation of cellular<br>macromolecule<br>biosynthetic process | [5, 6] | 434 | 38.339222 | 3.50E-50 | 4.39E-47 |
| GO:0000902 | cell morphogenesis                                              | [4, 5] | 343 | 42.085888 | 1.00E-49 | 1.26E-46 |

---

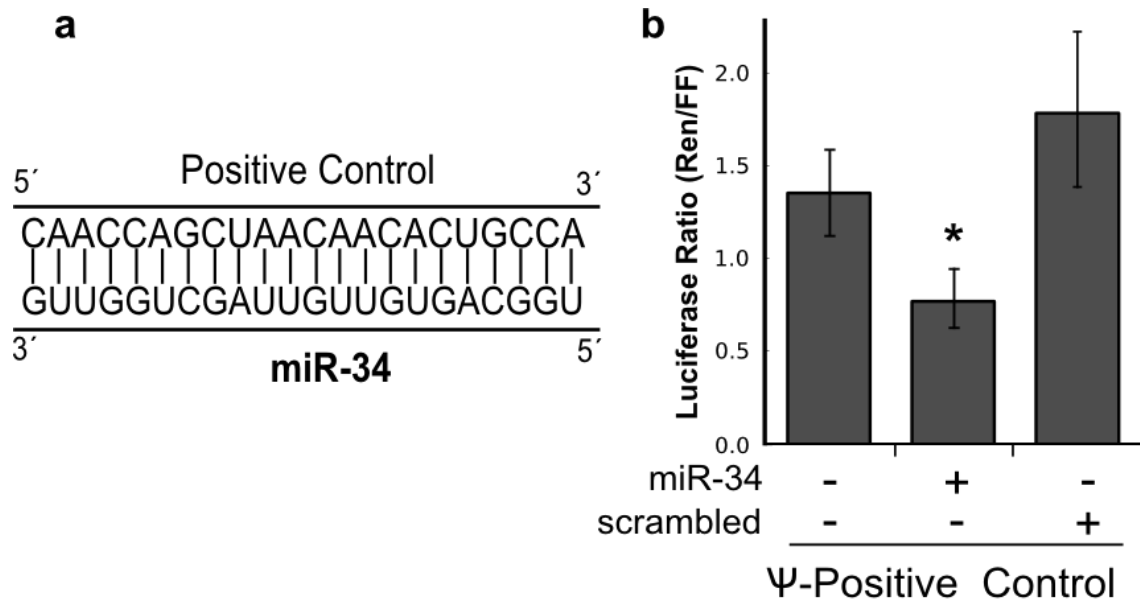

**Figure S2 – The positive-control vector showed significantly reduced luciferase activity in the presence of the *miR-34-5p* mimic.** Dual-luciferase reporter analysis of *miR-34-5p* target interactions. Changes in expression ratio of Firefly (Fluc) and chimeric *Renilla* luciferase (Rluc) containing perfectly matched target sites for *miR-34-5p* are treated with and without *miR-34-5p* mimic and scrambled RNA are shown. Two sample *t*-tests were used to test the effect of mimic *miR-34-5p* in the honey bee 3'UTRs, \*:  $p < 0.05$ . Schematic representation of positive control, perfect match 22pb *miR-34-5p* sequence (a). The positive control (b: Positive Control;  $p = 0.0005$ ) is significantly down-regulated by *miR-34-5p*.

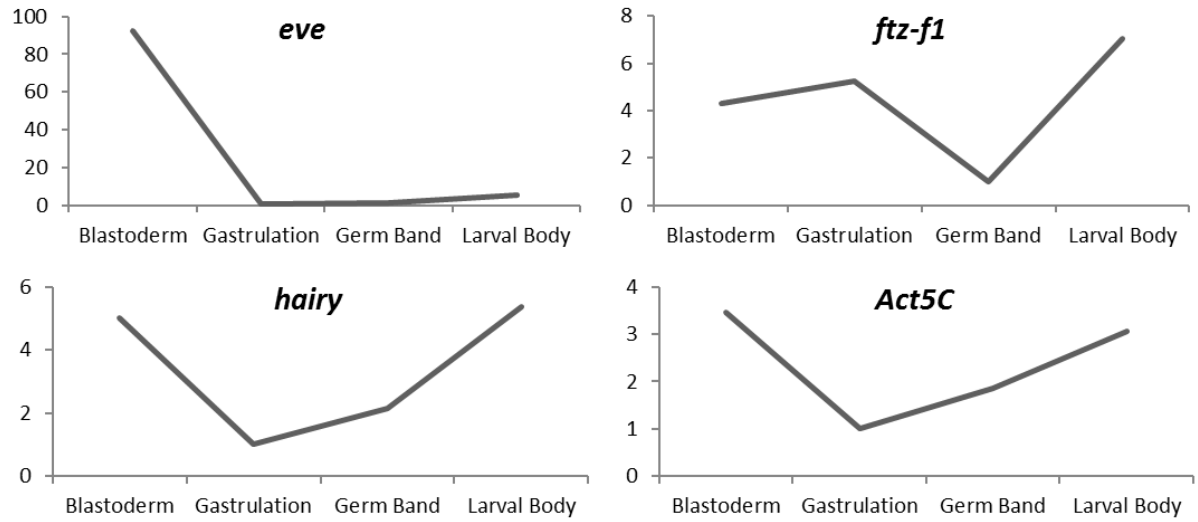

**Figure S3 – Expression profiles of *ame-miR-34-5p* targets in honey bee female embryos.** Transcript levels of *miR-34-5p* targets *eve*, *h*, *ftz-f1* and *act5C* by qPCR. The y-axis refers to transcript levels and x-axis, to the embryonic stages.

**Table S5 - Novel miRNAs and forward primers sequences used in RT-qPCR reactions.**

| <b>Novel miRNA</b>    | <b>miRNA Sequence (5'- 3')</b> | <b>Forward Primer (5'- 3')</b> | <b>Temp (oC)</b> |
|-----------------------|--------------------------------|--------------------------------|------------------|
| <b>ame-mir-92c-3p</b> | AAUUGCACUCGUCCCGGCCUGC         | AATTGCACTCGTCCCGGCCTGC         | 60               |
| <b>ame-mir-184-5p</b> | CCUUAUCAUUCUCCUGUCCGGU         | CCTTATCATTCTCCTGTCCGGT         | 60               |
| <b>ame-mir-306-3p</b> | CAAAGCAGCUUGGUACCUAACU         | CAAAGCAGCTTGGTACCTAACT         | 60               |
| <b>ame-mir-34-3p</b>  | CGACCGCUAUCGGCACUGCAAUU        | CGACCGCTATCGGCACTGCAATT        | 60               |

## Supplementary File S1

### Luciferase reporter assay method

We used the psiCHECK2 vector to perform the luciferase-reporter assays. psiCHECK2 vector contains the coding region for two luciferases: from Firefly (Insecta) and from Renilla (Cnidaria). The Firefly luciferase is used as an internal control. The Renilla luciferase contains the multiclonal sites at the 3' end, after the stop codon. The putative 3' UTR was then inserted in this multiclonal site what means that the Renilla luciferase transcripts were under control of our putative target region.

Gene structures and the predicted binding sites were annotated and visualized using the program Unigene (Okonechnikov *et al.* 2012). We designed primers flanking the binding-site regions in the 3' UTR of each candidate gene. The restriction sites recognized by Xho-I and Not-I were added to the 5' end of the forward and reverse primers, respectively. Further, the extension sequence 'CAGTGACT' was added to the 5' end of both forward and reverse primers to provide space for the enzyme anchoring (**Table S2**).

The designed primers were used to amplify miRNAs binding sites-containing regions of each candidate gene in a PCR reaction, using embryo cDNAs as a template. In addition, we designed control sequences (forward and reverse primers) containing one perfect match for the entire mir-34 sequence. These long primers (approximately 100 bp) were annealed in a buffer (100 mM Tris Hcl pH 7.5, 1 M NaCl, 10 M EDTA) for 40 minutes at 90 °C, followed by 2 hours at room temperature (RT). After the PCR amplification (3' UTRs) or the annealing procedure (control sequence), the samples were loaded into a 1% agarose gel and the fragments were purified using the QIAquick Gel Extraction Kit. Both PsiCHECK2 vector (2 ug) and purified fragment (700 ng) were digested by Not-I (1.5 µL; 20.000U/mL; New England Biolabs) and Xho-I (2.5 µL; 5.000 U/mL; New England Biolabs) enzymes in a reaction with 1.5 µL BSA, 4.0 µL Buffer 4 (New England Biolabs) and water up to 40 µL. The digestion reactions were incubated for 4 hours at 37 °C, followed by 30 minutes at 65 °C for enzymes inactivation. The digested



PsiCHECK2 vector was dephosphorylated by rAPid Alkaline Phosphatase (Roche) adding 3  $\mu\text{L}$  rApid enzyme and 6  $\mu\text{L}$  rApid enzyme buffer. The dephosphorylation reaction was incubated for 2 hours at 37  $^{\circ}\text{C}$ , then 15 minutes at 75  $^{\circ}\text{C}$  for enzyme inactivation. A ligation reaction was performed using 1.5  $\mu\text{L}$  T4 ligase (New England Biolabs), 1.5  $\mu\text{L}$  T4 Buffer, 150 ng of digested UTRs fragments and 50 ng of digested and dephosphorylated psiCHECK-2. After adding the ligation mix, the samples were incubated for 16 hours at 4  $^{\circ}\text{C}$ .

Chemically competent cells (One Shot<sup>®</sup> TOP10 Chemically Competent *E. coli*, Invitrogen) were mixed with 10  $\mu\text{L}$  ligation reaction and placed on ice for 30 minutes. The bacteria were then transfected with PsiCHECK2+3' UTR vectors through heat-shock (42  $^{\circ}\text{C}$  for 30 s, immediately followed by 2 minutes on ice). Then, 250  $\mu\text{L}$  SOC medium (Invitrogen) was added to the transformed bacteria, which were incubated for 1 hour at 37  $^{\circ}\text{C}$  and 225 rpm. Transformed bacteria were plated in solid LB + Ampicilin (50 ng/ $\mu\text{L}$ ) and incubated for 16 hours at 37  $^{\circ}\text{C}$ .

The colonies were screened for psiCHECK2+3'UTR using PCR reactions. Ten  $\mu\text{L}$  of PCR reaction mix (0.4  $\mu\text{L}$  50mM  $\text{MgCl}_2$ , 0.2  $\mu\text{L}$  100  $\mu\text{M}$  primer forward, 0.2  $\mu\text{L}$  100  $\mu\text{M}$  primer reverse, 0.1  $\mu\text{L}$  Taq DNA Polymerase and water up to 10  $\mu\text{L}$ ) were loaded in each well of a 96-wells plate. A pipette tip was rubbed on a new LB plate (called a 'master plate') and then placed into the PCR reaction mix, following which it was used to touch each colony. The master plate was used as a backup for the colonies tested in the PCR amplification and was placed in the incubator (37  $^{\circ}\text{C}$ ) for 16 hours. The PCR amplification was performed for 40 cycles (92  $^{\circ}\text{C}$  for 30 s, 60  $^{\circ}\text{C}$  for 30 s, 72  $^{\circ}\text{C}$  for 1 minutes) using primers flanking PsiCHECK2 multi-cloning region. The samples were loaded to a 1% agarose gel (2.5 mg agarose, 250 mL TAE1x Buffer) and visualized in the transilluminator (Safe Imager<sup>™</sup> 2.0 Blue Light, Invitrogen). We cultivated the colonies positive for the PsiCHECK2+3'UTR vector by touching them with a pipette tip (in the master plate) and placing the pipette tip in a falcon with 5 mL of liquid LB + Ampicilin (50 ng/ $\mu\text{L}$ ). The falcons were incubated for 16 hours at 28 $^{\circ}\text{C}$  and 200 rpm. The PsiCHECK2+3'UTR

vectors were then purified using the QIAgen Miniprep Kit and sequenced to confirm the identity of the fragment.

For the luciferase-reporter assays, we used COS-7 cells, which are derived from the kidney of African Green Monkey *Cercopithecus aethiops*. COS-7 cells were maintained in DMEM media (Dulbecco's Modified Eagle Medium, Invitrogen), containing 10% FBS (fetal bovine serum, Sigma-Aldrich) heat-inactivated (30 minutes, at 56 °C) and Penicillin/Streptomycin (5000 Units/mL and 5000 µg/mL respectively), at 37 °C and 5% CO<sub>2</sub>.

Three hours prior to transfection, COS-7 cells were plated to 24-well plates (0.5x10<sup>5</sup> cells/well). COS-7 cells were then co-transfected for 24 hours with PsiCHECK2 (containing or not the candidates 3' UTR) (Promega, 200 ng/well), miRIDIAN mimic mir-34 or scrambled sequence (Dharmacon, 40 pmol/well) using Lipofectamine® LTX with Plus™ Reagent (Invitrogen, 3 µl/well) according to the manufacturer's instructions. For each gene, three experimental conditions were tested: only the vector, the vector and the mimic miRNA, and the vector and the scrambled sequence (**Figure 1**). Twenty-four hours post-transfection, COS-7 cells were washed with phosphate-buffered saline (PBS) and lysed in 300 µL Passive Lysis Buffer (Promega) at room temperature for 10 minutes at 200 rpm. Twenty µL of cell lysates was transferred to a 96-well plate (Lumitrac 2000, Greiner Bio One). Dual-Luciferase Reporter Assay System (Promega) was used to determine Firefly and Renilla luciferase activities. Using the micro injectors of POLARstart OPTIMA luminescence counter (BMG Labtech), 100 µL of luciferase assay reagent II was added to each well and the Firefly luciferase activity was measured. In sequence, 100 µl Stop&Glo reagent were loaded in each well Renilla luciferase activities were measured. The ratio between Renilla and Firefly luciferase activities was calculated for each experiment and the results were reported as the average of six replicates assays.

In our experiments, firstly the Firefly luciferase activity was measured (the Firefly luciferase is not under control of our putative target). We did not expected changes under the tested

conditions. Secondly, we measured the Renilla luciferase activity level. The Renilla luciferase activity was divided by the Firefly luciferase activity, in order to normalize the data based on the transfection efficiency.

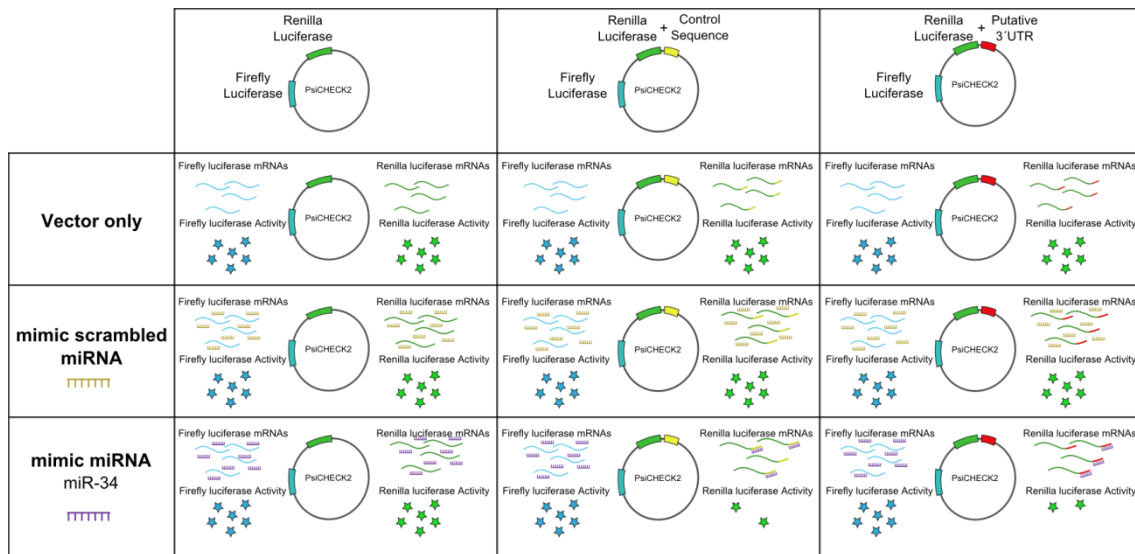

**Figure 1** – Experimental conditions for luciferase-reporter assay. The Control Sequence contains two perfect matches for the entire miRNA. In the cells transfected with PsiCHECK2+3'UTR or Control Sequence, a decrease in Renilla activity in the presence of the mimic miRNA is expected.

## References

Okonechnikov K., Golosova O., Fursov M. & team U. (2012) Unipro UGENE: a unified bioinformatics toolkit. *Bioinformatics* 28, 1166-7.

**Table S6a - Primers used in luciferase assay in the amplification of 3'UTR (MREs). Genes name, primers name and sequence, fragment size, annealing temperature, access number of *A. mellifera* . The sequence 'CAGTGACT' corresponds to an extension for proper restriction enzyme anchoring and the sequences 'CTCGAG' and 'GCGGCCGC' correspond to the recognition sequence of the restriction Xho-I and Not-I, respectively.**

| Gene          | Region | Primers name           | Primers Sequence (5'- 3')                    | Fragment Size (pb) | Temp (oC) | <i>A. mellifera</i> Access Number |
|---------------|--------|------------------------|----------------------------------------------|--------------------|-----------|-----------------------------------|
| <i>eve</i>    | 3'UTR  | ameve_34-5p_XhoI_F1    | CAGTGACT/CTCGAG/TGAAGAAGCCGAGAACCTTT         | 121                | 59        | GB49029                           |
|               |        | ameve_34-5p_NotI_R2    | CAGTGACT/GCGGCCGC/ACATTCGCATTCAGTCTCGAT      |                    |           |                                   |
| <i>Ftz-f1</i> | 3'UTR  | amftz-f1_34-5p_XhoI_F1 | CAGTGACT/CTCGAG/TTGTCAATGTGGACCTCAAGT        | 319                | 58        | GB42142                           |
|               |        | amftz-f1_34-5p_NotI_R4 | CAGTGACT/GCGGCCGC/TTTGTTAACCACCCTTTGTACTGT   |                    |           |                                   |
| <i>hairy</i>  | 3'UTR  | hairy_34-5p_XhoI_F1    | CAGTGACT/CTCGAG/GGGTGGGTGAAAGGAAGTG          | 169                | 60        | GB47799                           |
|               |        | hairy_34-5p_NotI_R2    | CAGTGACT/GCGGCCGC/ATACGGTTCCTTAAACGA         |                    |           |                                   |
| <i>act5C</i>  | 3'UTR  | act5C_utr_R4           | CAGTGACT/CTCGAG/GACGATTCTTTCTCCGTCGT         | 537                | 58        | GB44311                           |
|               |        | act5C_utr_F1           | CAGTGACT/GCGGCCGC/TGTCTTTAAATATCGGCGGAGT     |                    |           |                                   |
| <i>wg</i>     | 3'UTR  | amwg_34-5p_XhoI_F1     | CAGTGACT/CTCGAG/GTTGCGTTCGGTTTTCGAC          | 92                 | 60        | GB45510                           |
|               |        | amwg_34-5p_NotI_R2     | CAGTGACT/GCGGCCGC/GCGTAATACTGAGAGACAATACAGGA |                    |           |                                   |

**TableS6b - Sequence of the mimic miRNAs used in luciferase assay**

|           | mimic sequence         |
|-----------|------------------------|
| scrambled | ATCACTTAGCAGTCAACCTAC  |
| miR-34    | TGGCAGTGTTGTTAGCTGGTTG |

**TableS7 - Primers used to amplify coding regions of gene *eve*, *ftz-f1*, *h*, *act5C* by RT-qPCR. Genes name, primers name and sequence, fragment size, annealing temperature, access number of *A. mellifera* .**

| Gene          | Region | Primers name                     | Primers Sequence (5'- 3')                     | Fragment Size (pb) | Temp (oC) | <i>A. mellifera</i><br>Access Number |
|---------------|--------|----------------------------------|-----------------------------------------------|--------------------|-----------|--------------------------------------|
| <i>eve</i>    | CDS    | ameve_CDS_F1<br>ameve_CDS_R2     | AATTACGTGAGCAGGCCAAG<br>GCCATCCTTTGACGCTTATC  | 116                | 60        | GB49029                              |
| <i>Ftz-f1</i> | CDS    | FTZ-F<br>FTZ-R                   | GACTGGGCAAGGAATTCTGT<br>CCATTATGAAGCGTAGTCTCA | 152                | 60        | GB42142                              |
| <i>hairy</i>  | CDS    | amhairy_CDS_F1<br>amhairy_CDS_R2 | TATGGAAAAGCGGAGACGAG<br>GTTTCACCGTCATCTCCAGAA | 137                | 60        | GB47799                              |
| <i>act5c</i>  | CDS    | amAct5C_CDS_F1<br>amAct5C_CDS_R2 | AGGCCAATCGTGAAAAGATG<br>CCGGTAGTACGTCCAGAAGC  | 112                | 60        | GB44311                              |
| <i>rp49</i>   | CDS    | amrp49-F<br>amrp49-R             | CGTCATATGTTGCCAACTGGT<br>TTGAGCACGTTCAACAATGG | 150                | 60        | GB47227                              |
